# Supplementary material for: Role of the B Allele of Influenza A Virus Segment 8 in Setting Mammalian Host Range and Pathogenicity
Source: PubMed Central journal article supplement (PMC5044859; doi:10.1128/jvi.01205-16), 2016-09-29
Supplement: JVI.01205-16_zjv999182012so1.pdf [file JVI.01205-16_zjv999182012so1.pdf]

## **Turnbull et al: Supporting information**

### **File list (this pdf):**

**Table S1. Individual cellular transcript assays for mouse RT-qPCR array.**

**Table S2. Distribution of sequences.**

**Fig S1. Neighbour joining tree of a subsample of Avian A sequences with sub-lineages highlighted.**

**Table S3. Details of mammalian introductions.**

**Fig S2. NS1 protein alignment.**

### **Uploaded separately:**

**Table S4. Relative abundance over time of each protein quantified, during infection of A549 cells.**

**Fig S1.xls. This is a separate file viewable in the programme figTree (downloadable in Mac and PC versions from <http://tree.bio.ed.ac.uk/software/figtree/>) which allows large phylogenetic trees to be viewed on screen at a magnification that permits virus strain names to be read.**

**Table S1. Individual cellular transcript assays for mouse RT-qPCR array.** Individual RT-qPCR assays are available online ([www.lifetechnologies.com](http://www.lifetechnologies.com)).

| <b>Cellular Transcript</b> | <b>Taqman® Assay ID</b> |
|----------------------------|-------------------------|
| 18S                        | Hs99999901_s1           |
| Gapdh                      | Mm99999915_g1           |
| Hprt1                      | Mm00446968_m1           |
| Gusb                       | Mm00446953_m1           |
| Ifna2                      | Mm00833961_s1           |
| Ifna4                      | Mm00833969_s1           |
| Ifnb1                      | Mm00439546_s1           |
| Igng                       | Mm00801778_m1           |
| Il28b                      | Mm00663660_g1           |
| Tnf                        | Mm00443259_g1           |
| Tnfsf10                    | Mm00437174_m1           |
| Il1b                       | Mm01336189_m1           |
| Il6                        | Mm00446190_m1           |
| Il10                       | Mm00439615_g1           |
| Il17b                      | Mm00444686_m1           |
| Cxcl1                      | Mm00433859_m1           |
| Cxcl10                     | Mm00445235_m1           |
| Ccl2                       | Mm00441242_m1           |
| Ccl3                       | Mm00441259_g1           |
| Ccl4                       | Mm00443111_m1           |
| Csf1                       | Mm00432686_m1           |
| Csf3                       | Mm00438335_g1           |
| Ifit1                      | Mm00515153_m1           |
| Ifit3                      | Mm01704846_s1           |
| Ifih1                      | Mm00459183_m1           |
| Irf7                       | Mm00516788_m1           |
| Isg15                      | Mm01705338_s1           |
| Oas1b                      | Mm00449297_m1           |
| Mx1                        | Mm01217998_m1           |
| Ddx58                      | Mm00554529_m1           |
| Fasl                       | Mm00438864_m1           |
| Stat1                      | Mm00439531_m1           |

## Table S2 : Distribution of Sequences

NS sequences from GenBank with unique isolate names and Host, Subtype and Location information.  
Excludes environmental samples and mixed subtype samples.

| Lineage | AvianA | AvianB | ClassicalSwine | HumanSeasonal | Pandemic2009 | All   |
|---------|--------|--------|----------------|---------------|--------------|-------|
| Total   | 10914  | 2725   | 1872           | 7213          | 6098         | 28822 |

| Host        | AvianA | AvianB | ClassicalSwine | HumanSeasonal | Pandemic2009 | All   |
|-------------|--------|--------|----------------|---------------|--------------|-------|
| Avian       | 9613   | 2717   | 22             | 2             | 5            | 12359 |
| Swine       | 519    | 4      | 1807           | 72            | 561          | 2963  |
| Human       | 325    | 1      | 38             | 7136          | 5518         | 13018 |
| Equine      | 178    | 1      | 1              | 0             | 0            | 180   |
| Canine      | 232    | 0      | 0              | 2             | 6            | 240   |
| OtherMammal | 47     | 2      | 4              | 1             | 8            | 62    |

| Continent    | AvianA | AvianB | ClassicalSwine | HumanSeasonal | Pandemic2009 | All   |
|--------------|--------|--------|----------------|---------------|--------------|-------|
| Asia         | 5263   | 351    | 431            | 1700          | 1762         | 9507  |
| Europe       | 1038   | 378    | 7              | 523           | 1241         | 3187  |
| Africa       | 372    | 11     | 0              | 67            | 62           | 512   |
| NorthAmerica | 4092   | 1945   | 1434           | 3277          | 2408         | 13156 |
| SouthAmerica | 36     | 25     | 0              | 757           | 438          | 1256  |
| Oceania      | 109    | 15     | 0              | 889           | 187          | 1200  |
| Antarctica   | 4      | 0      | 0              | 0             | 0            | 4     |

| H-subtype | AvianA | AvianB | ClassicalSwine | HumanSeasonal | Pandemic2009 | All  |
|-----------|--------|--------|----------------|---------------|--------------|------|
| H1        | 769    | 172    | 1176           | 1616          | 5924         | 9657 |
| H2        | 321    | 87     | 3              | 98            | 0            | 509  |
| H3        | 1294   | 648    | 692            | 5498          | 174          | 8306 |
| H4        | 876    | 494    | 0              | 0             | 0            | 1370 |
| H5        | 2981   | 337    | 0              | 1             | 0            | 3319 |
| H6        | 1131   | 275    | 0              | 0             | 0            | 1406 |
| H7        | 845    | 374    | 1              | 0             | 0            | 1220 |
| H8        | 113    | 25     | 0              | 0             | 0            | 138  |
| H9        | 1359   | 64     | 0              | 0             | 0            | 1423 |
| H10       | 580    | 63     | 0              | 0             | 0            | 643  |
| H11       | 387    | 141    | 0              | 0             | 0            | 528  |
| H12       | 116    | 37     | 0              | 0             | 0            | 153  |
| H13       | 92     | 1      | 0              | 0             | 0            | 93   |
| H14       | 8      | 6      | 0              | 0             | 0            | 14   |
| H15       | 8      | 1      | 0              | 0             | 0            | 9    |
| H16       | 34     | 0      | 0              | 0             | 0            | 34   |

| N-subtype | AvianA | AvianB | ClassicalSwine | HumanSeasonal | Pandemic2009 | All   |
|-----------|--------|--------|----------------|---------------|--------------|-------|
| N1        | 3492   | 453    | 767            | 1575          | 5811         | 12098 |
| N2        | 2763   | 681    | 1101           | 5638          | 287          | 10470 |
| N3        | 751    | 135    | 3              | 0             | 0            | 889   |
| N4        | 206    | 43     | 0              | 0             | 0            | 249   |
| N5        | 228    | 93     | 0              | 0             | 0            | 321   |
| N6        | 1111   | 467    | 0              | 0             | 0            | 1578  |
| N7        | 677    | 66     | 0              | 0             | 0            | 743   |
| N8        | 1113   | 652    | 1              | 0             | 0            | 1766  |
| N9        | 573    | 135    | 0              | 0             | 0            | 708   |

**Fig S1. Neighbour joining tree of a subsample of Avian A sequences with sub-lineages highlighted.**

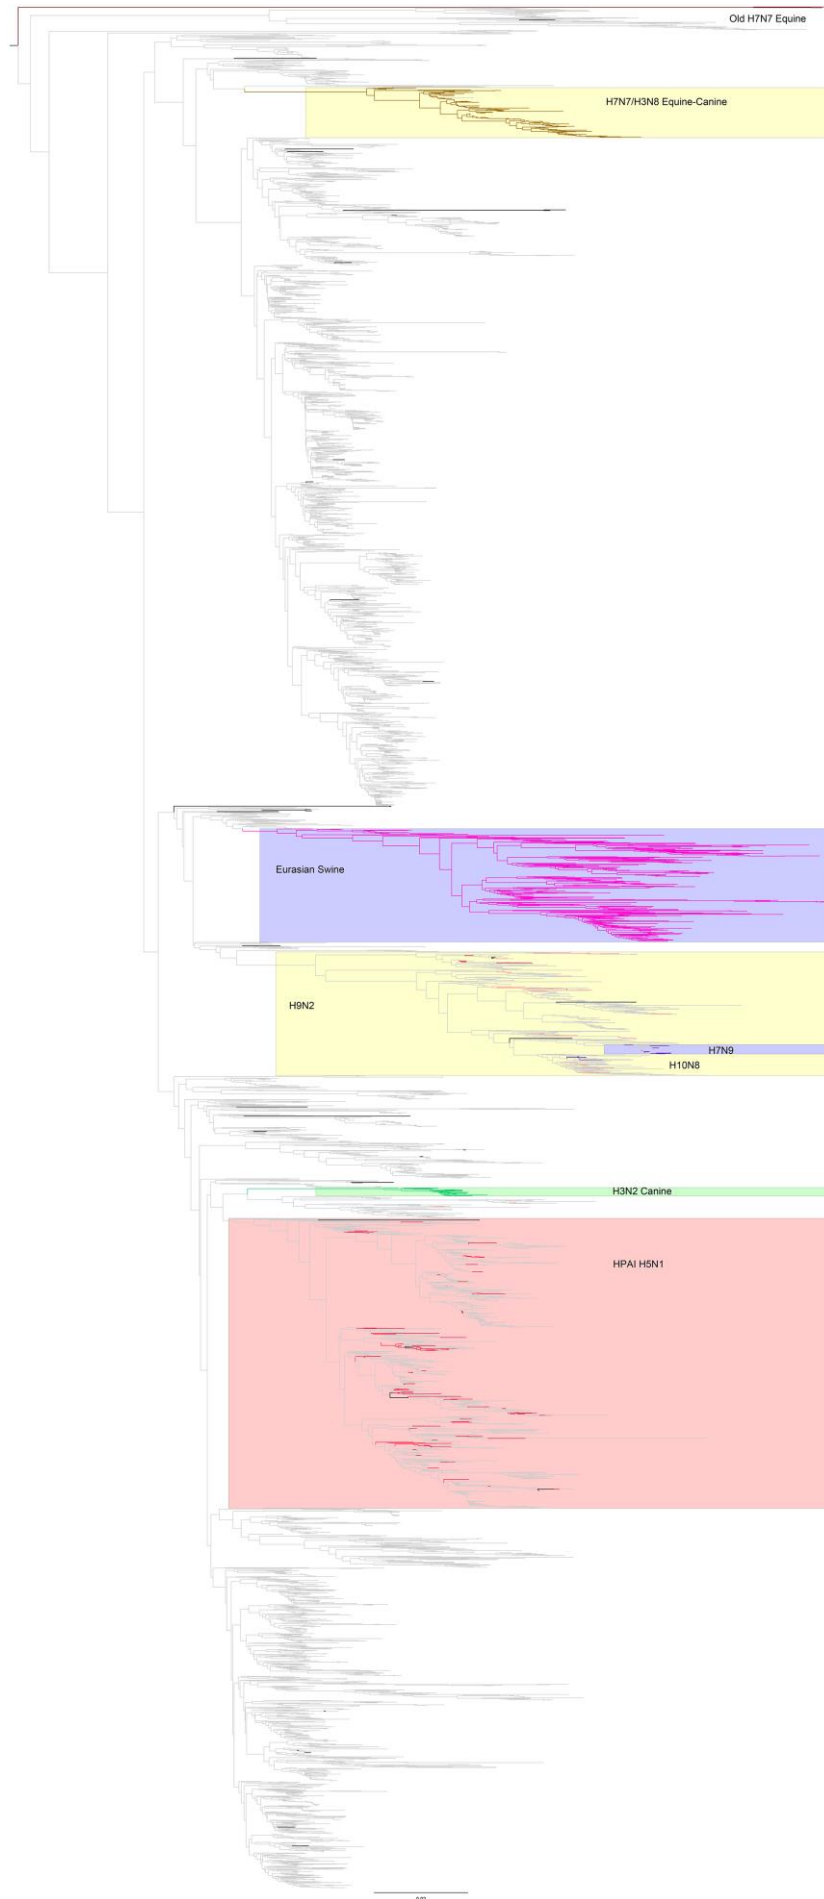

**Table S3 : Details of mammalian introductions - source information obtained by analysing sequences returned by BLAST**

| <b>Domestic Source</b>         |                  |                                  |             |                |                 |             | <b>Ancestral State Estimation</b> |                    | <b>Blast Summary (of sequences between 3 and 0 years older if possible)</b> |             |                 |                |                      |                |
|--------------------------------|------------------|----------------------------------|-------------|----------------|-----------------|-------------|-----------------------------------|--------------------|-----------------------------------------------------------------------------|-------------|-----------------|----------------|----------------------|----------------|
| <b>Allele/Clade</b>            | <b>Accession</b> | <b>IsolateName</b>               | <b>Host</b> | <b>Subtype</b> | <b>Region</b>   | <b>Year</b> | <b>AvianAncestor</b>              | <b>Probability</b> | <b>#BLAST</b>                                                               | <b>Host</b> | <b>HostType</b> | <b>Subtype</b> | <b>Region</b>        | <b>Year</b>    |
| Avian A                        | M80968           | A/swine/China/8/1978(H3N2)       | Swine       | H3N2           | EasternAsia     | 1978        | Dom-ans                           | 0.46               | 13                                                                          | Avian:100%  | Dom-ans:69%     | H6N1:15%       | EasternAsia:77%      | 1977:1976-1978 |
| Avian A (magenta on lilac)     | CY037902         | A/swine/Belgium/WVL1/1979(H1N1)  | Swine       | H1N1           | WesternEurope   | 1979        | Dom-ans                           | 0.89               | 30                                                                          | Avian:97%   | Dom-ans:57%     | H1N9:20%       | EasternAsia:63%      | 1977:1976-1979 |
| Avian A                        | GQ176140         | A/mink/Sweden/3900/1984(H10N4)   | Mink        | H10N4          | NorthernEurope  | 1984        | Dom-ans                           | 0.93               | 4                                                                           | Avian:100%  | Wild-ans:100%   | H2N1:50%       | WesternEurope:50%    | 1982:1981-1983 |
| Avian B                        | M65020           | A/equine/Jilin/1/1989(H3N8)      | Equine      | H3N8           | EasternAsia     | 1989        | Dom-ans                           | 0.98               | 2                                                                           | Avian:100%  | Dom-ans:50%     | H5N2:50%       | EasternAsia:50%      | 1986:1986-1987 |
| Avian A                        | CY085013         | A/swine/Hong Kong/644/1993(H1N1) | Swine       | H1N1           | EasternAsia     | 1993        | Dom-ans                           | 0.33               | 4                                                                           | Avian:50%   | Dom-ans:50%     | H1N1:50%       | EasternAsia:100%     | 1992:1992-1993 |
| Avian A                        | GU053113         | A/England/AV877/1996(H7N7)       | Human       | H7N7           | NorthernEurope  | 1996        | Dom                               | manual             | 3                                                                           | Avian:100%  | Dom-ans:67%     | H4N4:33%       | EasternAsia:67%      | 1993:1993-1994 |
| Avian A                        | CY115892         | A/swine/Eire/89/1996(H1N1)       | Swine       | H1N1           | NorthernEurope  | 1996        | Dom-ans                           | 0.66               | 2                                                                           | Avian:50%   | Dom-ans:50%     | H7N4:50%       | EasternAsia:50%      | 1994:1993-1996 |
| Avian A (red/peach on yellow)  | AF084285         | A/Hong Kong/482/97(H5N1)         | Human       | H5N1           | EasternAsia     | 1997        | Dom-gal                           | manual             | 21                                                                          | Avian:52%   | NonAvian:48%    | H5N1:81%       | EasternAsia:100%     | 1997:1997-1997 |
| Avian A                        | CY073456         | A/swine/KU/2/2001(H11N6)         | Swine       | H11N6          | EasternAsia     | 2001        | Dom                               | no close           | 5                                                                           | Avian:80%   | Dom-ans:40%     | H9N2:40%       | EasternAsia:60%      | 2000:1998-2001 |
| Avian B                        | CY067690         | A/swine/KU/16/2001(H7N2)         | Swine       | H7N2           | EasternAsia     | 2001        | Dom-ans                           | 0.98               | 11                                                                          | Avian:100%  | Wild-ans:55%    | H6N2:18%       | WesternEurope:55%    | 2000:1999-2001 |
| Avian A (red on pink)          | EF587281         | A/Beijing/01/2003(H5N1)          | Human       | H5N1           | EasternAsia     | 2003        | Dom-ans                           | 0.61               | 108                                                                         | Avian:96%   | Dom-gal:58%     | H5N1:100%      | EasternAsia:93%      | 2002:2000-2003 |
| Avian A                        | AY342423         | A/Netherlands/033/03(H7N7)       | Human       | H7N7           | WesternEurope   | 2003        | Dom-gal                           | 1.00               | 25                                                                          | Avian:96%   | Wild-ans:60%    | H7N7:20%       | NorthernEurope:60%   | 2002:2000-2003 |
| Avian B                        | EU587374         | A/New_York/107/2003(H7N2)        | Human       | H7N2           | NorthernAmerica | 2003        | Dom-gal                           | 0.83               | 6                                                                           | Avian:100%  | Dom-gal:100%    | H7N2:100%      | NorthernAmerica:100% | 2002:2001-2003 |
| Avian A                        | CY015010         | A/Canada/rv504/2004(H7N3)        | Human       | H7N3           | NorthernAmerica | 2004        | Dom-gal                           | 1.00               | 12                                                                          | Avian:100%  | Wild-ans:67%    | H7N3:33%       | NorthernAmerica:100% | 2003:2001-2004 |
| Avian A                        | AY790309         | A/swine/Korea/S452/2004(H9N2)    | Swine       | H9N2           | EasternAsia     | 2004        | Dom-gal                           | manual             | 19                                                                          | Avian:95%   | Dom-gal:37%     | H9N2:42%       | EasternAsia:47%      | 2003:2001-2004 |
| Avian A                        | JX500447         | A/swine/Hubei/10/2008(H10N5)     | Swine       | H10N5          | EasternAsia     | 2008        | Dom-ans                           | 0.72               | 13                                                                          | Avian:100%  | Wild-ans:69%    | H4N6:23%       | EasternAsia:77%      | 2007:2005-2008 |
| Avian A                        | JQ815882         | A/swine/Yangzhou/080/2009(H6N6)  | Swine       | H6N6           | EasternAsia     | 2009        | Dom-ans                           | 0.99               | 45                                                                          | Avian:100%  | Dom-ans:98%     | H6N6:58%       | EasternAsia:100%     | 2007:2006-2009 |
| Avian A                        | JX151011         | A/swine/Guangdong/K4/2011(H4N8)  | Swine       | H4N8           | EasternAsia     | 2011        | Dom-ans                           | 0.49               | 33                                                                          | Avian:94%   | Wild-ans:55%    | H3N2:21%       | EasternAsia:88%      | 2010:2008-2011 |
| Avian A                        | CY125732         | A/Mexico/InDRE7218/2012(H7N3)    | Human       | H7N3           | CentralAmerica  | 2012        | Dom                               | manual             | 7                                                                           | Avian:100%  | Wild-ans:71%    | H10N7:29%      | NorthernAmerica:71%  | 2011:2010-2012 |
| Avian A (blue within yellow)   | KJ406559         | A/Jiangxi/IPB13/2013(H10N8)      | Human       | H10N8          | EasternAsia     | 2013        | Dom-gal                           | 0.72               | 31                                                                          | Avian:87%   | Dom-gal:77%     | H9N2:81%       | EasternAsia:90%      | 2011:2010-2013 |
| Avian A (purple within yellow) | KC896778         | A/Nanjing/1/2013(H7N9)           | Human       | H7N9           | EasternAsia     | 2013        | Dom-gal                           | 0.98               | 109                                                                         | Avian:65%   | Dom-gal:59%     | H7N9:42%       | EasternAsia:98%      | 2012:2010-2013 |

  

| <b>Wild Source</b>        |                  |                                          |             |                |                 |             | <b>Ancestral State Estimation</b> |                    | <b>Blast Summary (of sequences between 3 and 0 years older if possible)</b> |             |                 |                |                      |                |
|---------------------------|------------------|------------------------------------------|-------------|----------------|-----------------|-------------|-----------------------------------|--------------------|-----------------------------------------------------------------------------|-------------|-----------------|----------------|----------------------|----------------|
| <b>Allele</b>             | <b>Accession</b> | <b>IsolateName</b>                       | <b>Host</b> | <b>Subtype</b> | <b>Region</b>   | <b>Year</b> | <b>AvianAncestor</b>              | <b>Probability</b> | <b>#BLAST</b>                                                               | <b>Host</b> | <b>HostType</b> | <b>Subtype</b> | <b>Region</b>        | <b>Year</b>    |
| Avian A (brown on yellow) | CY028840         | A/equine/Miami/1/1963(H3N8)              | Equine      | H3N8           | NorthernAmerica | 1963        | Wild-ans                          | 0.99               | 4                                                                           | Equine:100% | NonAvian:100%   | H3N8:100%      | NorthernAmerica:50%  | 1963:1963-1963 |
| Avian A                   | AB284067         | A/seal/Massachusetts/1/1980(H7N7)        | Seal        | H7N7           | NorthernAmerica | 1980        | Wild-ans                          | 1.00               | 17                                                                          | Avian:100%  | Wild-ans:76%    | H2N3:24%       | NorthernAmerica:100% | 1978:1977-1980 |
| Avian A                   | M80947           | A/seal/Massachusetts/133/1982(H4N5)      | Seal        | H4N5           | NorthernAmerica | 1982        | Wild-ans                          | 1.00               | 19                                                                          | Avian:100%  | Wild-ans:79%    | H4N2:21%       | NorthernAmerica:100% | 1980:1979-1982 |
| Avian A                   | KJ372724         | A/whale/Maine/328B/1984(H13N2)           | Whale       | H13N2          | NorthernAmerica | 1984        | Wild-other                        | 0.98               | 5                                                                           | Avian:100%  | Wild-ans:60%    | H13N6:40%      | WesternEurope:60%    | 1983:1981-1983 |
| Avian A                   | GU052287         | A/seal/Massachusetts/3911/1992(H3N3)     | Seal        | H3N3           | NorthernAmerica | 1992        | Wild-ans                          | 0.98               | 86                                                                          | Avian:100%  | Wild-ans:88%    | H11N9:13%      | NorthernAmerica:100% | 1980:1974-1990 |
| Avian A                   | AF285889         | A/swine/Ontario/01911-1/99(H4N6)         | Swine       | H4N6           | NorthernAmerica | 1999        | Wild-ans                          | 1.00               | 7                                                                           | Avian:100%  | Wild-ans:100%   | H6N8:29%       | NorthernAmerica:100% | 1998:1996-1999 |
| Avian B                   | GU052363         | A/muskrat/Buryatiya/1944/2000(H4N6)      | Muskrat     | H4N6           | EasternEurope   | 2000        | Wild                              | manual             | 10                                                                          | Avian:100%  | Dom-gal:30%     | H4N6:30%       | EasternEurope:40%    | 1999:1998-2000 |
| Avian A                   | AY619965         | A/swine/Ontario/K01477/01(H3N3)          | Swine       | H3N3           | NorthernAmerica | 2001        | Wild-ans                          | 0.92               | 9                                                                           | Avian:100%  | Wild-ans:100%   | H4N6:22%       | NorthernAmerica:100% | 1999:1998-1999 |
| Avian B                   | AY619957         | A/swine/Saskatchewan/18789/02(H1N1)      | Swine       | H1N1           | NorthernAmerica | 2002        | Wild-ans                          | 1.00               | 31                                                                          | Avian:100%  | Wild-ans:77%    | H2N1:16%       | NorthernAmerica:100% | 2001:1999-2002 |
| Avian A                   | KJ847690         | A/Caspian_seal/Russia/1884/2002(H4N6)    | Seal        | H4N6           | EasternEurope   | 2002        | Wild-ans                          | 0.96               | 10                                                                          | Avian:100%  | Wild-ans:80%    | H10N9:20%      | NorthernEurope:60%   | 2002:2001-2002 |
| Avian A (green on green)  | GU433352         | A/canine/Guangdong/1/2006(H3N2)          | Canine      | H3N2           | EasternAsia     | 2006        | Wild-ans                          | 0.50               | 32                                                                          | Avian:97%   | Wild-ans:91%    | H4N6:38%       | NorthernEurope:72%   | 2005:2003-2006 |
| Avian B                   | FJ461601         | A/swine/Korea/C13/2008(H5N2)             | Swine       | H5N2           | EasternAsia     | 2008        | Wild-ans                          | 0.92               | 35                                                                          | Avian:97%   | Wild-ans:63%    | H5N2:40%       | EasternAsia:91%      | 2006:2005-2008 |
| Avian A                   | GU215038         | A/swine/Jilin/37/2008(H3N2)              | Swine       | H3N2           | EasternAsia     | 2008        | Wild-ans                          | 0.49               | 24                                                                          | Avian:100%  | Wild-ans:62%    | H4N6:29%       | EasternAsia:71%      | 2007:2005-2008 |
| Avian A                   | JX878679         | A/swine/HuBei/06/2009(H4N1)              | Swine       | H4N1           | EasternAsia     | 2009        | Wild-ans                          | 0.96               | 32                                                                          | Avian:100%  | Wild-ans:53%    | H4N6:16%       | EasternAsia:66%      | 2008:2006-2009 |
| Avian A                   | JQ433883         | A/harbor_seal/Massachusetts/1/2011(H3N8) | Seal        | H3N8           | NorthernAmerica | 2011        | Wild-ans                          | 1.00               | 35                                                                          | Avian:100%  | Wild-ans:100%   | H4N6:29%       | NorthernAmerica:94%  | 2010:2008-2011 |

  

| <b>Undetermined</b> |                  |                               |             |                |                 |             | <b>Ancestral State Estimation</b> |                    | <b>Blast Summary (of sequences between 3 and 0 years older if possible)</b> |             |                 |                |                     |                |
|---------------------|------------------|-------------------------------|-------------|----------------|-----------------|-------------|-----------------------------------|--------------------|-----------------------------------------------------------------------------|-------------|-----------------|----------------|---------------------|----------------|
| <b>Allele</b>       | <b>Accession</b> | <b>IsolateName</b>            | <b>Host</b> | <b>Subtype</b> | <b>Region</b>   | <b>Year</b> | <b>AvianAncestor</b>              | <b>Probability</b> | <b>#BLAST</b>                                                               | <b>Host</b> | <b>HostType</b> | <b>Subtype</b> | <b>Region</b>       | <b>Year</b>    |
| Avian A             | AF333238         | A/Brevig_Mission/1/1918(H1N1) | Human       | H1N1           | NorthernAmerica | 1918        | Avian                             | no close           | 39                                                                          | Human:56%   | NonAvian:56%    | H1N1:59%       | NorthernAmerica:67% | 1957:1933-2007 |
| Avian A (brown)     | CY087820         | A/equine/Prague/2/1956(H7N7)  | Equine      | H7N7           | EasternEurope   | 1956        | Avian                             | no close           | 2                                                                           | Equine:100% | NonAvian:100%   | H7N7:100%      | EasternEurope:100%  | 1956:1956-1956 |

RNA Binding Domain (1-73) Short Linker (74-84)

|         |   | 20 | a | b | c | 40 | d | e | 60 | f | 73 | 80 | 85 | g | h | 100 |   |   |   |   |   |   |   |   |   |   |   |   |   |   |   |   |   |   |   |   |   |   |   |   |   |   |   |   |   |   |   |   |   |   |   |   |   |   |   |   |   |   |   |   |   |   |   |   |   |   |   |   |   |   |   |   |   |   |   |   |   |   |   |   |   |   |   |   |   |   |   |   |   |   |   |   |   |   |   |   |   |   |
|---------|---|----|---|---|---|----|---|---|----|---|----|----|----|---|---|-----|---|---|---|---|---|---|---|---|---|---|---|---|---|---|---|---|---|---|---|---|---|---|---|---|---|---|---|---|---|---|---|---|---|---|---|---|---|---|---|---|---|---|---|---|---|---|---|---|---|---|---|---|---|---|---|---|---|---|---|---|---|---|---|---|---|---|---|---|---|---|---|---|---|---|---|---|---|---|---|---|---|---|
| PR8     | 1 | M  | D | E | N | T  | V | S | S  | F | V  | D  | C  | F | L | W   | H | R | K | R | F | A | D | Q | E | L | G | D | A | P | L | D | R | L | R | R | D | K | S | L | R | G | R | G | S | T | L | G | L | D | I | E | T | A | T | R | A | G | K | I | V | E | R | I | L | K | E | E | S | D | E | A | L | K | M | T | A | S | S | P | A | S | R | Y | L | T | D | M | T | L | E | E | M | S | R |   |   |   |
| Ca17    | 1 | M  | D | S | N | T  | V | S | S  | F | V  | D  | C  | F | L | W   | H | R | K | R | F | A | D | Q | E | L | G | D | A | P | L | D | R | L | R | R | D | K | S | L | R | G | R | G | S | T | L | G | L | D | I | E | T | A | T | R | A | G | K | I | V | E | R | I | L | K | E | E | S | D | E | A | L | K | M | T | A | S | S | P | A | S | R | Y | L | T | D | M | T | L | E | E | M | S | R |   |   |   |
| Udorn72 | 1 | M  | D | S | N | T  | V | S | S  | F | V  | D  | C  | F | L | W   | H | R | K | R | F | A | D | Q | E | L | G | D | A | P | L | D | R | L | R | R | D | K | S | L | R | G | R | G | S | T | L | G | L | D | I | E | T | A | T | R | A | G | K | I | V | E | R | I | L | K | E | E | S | D | E | A | L | K | M | T | A | S | S | P | A | S | R | Y | L | T | D | M | T | L | E | E | M | S | R |   |   |   |
| O175A   | 1 | M  | D | S | N | T  | V | S | S  | F | V  | D  | C  | F | L | W   | H | R | K | R | F | A | D | Q | E | L | G | D | A | P | L | D | R | L | R | R | D | K | S | L | R | G | R | G | S | T | L | G | L | D | I | E | T | A | T | R | A | G | K | I | V | E | R | I | L | K | E | E | S | D | E | A | L | K | M | T | A | S | S | P | A | S | R | Y | L | T | D | M | T | L | E | E | M | S | R |   |   |   |
| O173A   | 1 | M  | D | S | N | T  | V | S | S  | F | V  | D  | C  | F | L | W   | H | R | K | R | F | A | D | Q | E | L | G | D | A | P | L | D | R | L | R | R | D | K | S | L | R | G | R | G | S | T | L | G | L | D | I | E | T | A | T | R | A | G | K | I | V | E | R | I | L | K | E | E | S | D | E | A | L | K | M | T | A | S | S | P | A | S | R | Y | L | T | D | M | T | L | E | E | M | S | R |   |   |   |
| O340A   | 1 | M  | D | S | N | T  | V | S | S  | F | V  | D  | C  | F | L | W   | H | R | K | R | F | A | D | Q | E | L | G | D | A | P | L | D | R | L | R | R | D | K | S | L | R | G | R | G | S | T | L | G | L | D | I | E | T | A | T | R | A | G | K | I | V | E | R | I | L | K | E | E | S | D | E | A | L | K | M | T | A | S | S | P | A | S | R | Y | L | T | D | M | T | L | E | E | M | S | R |   |   |   |
| M1124A  | 1 | M  | D | S | N | T  | V | S | S  | F | V  | D  | C  | F | L | W   | H | R | K | R | F | A | D | Q | E | L | G | D | A | P | L | D | R | L | R | R | D | K | S | L | R | G | R | G | S | T | L | G | L | D | I | E | T | A | T | R | A | G | K | I | V | E | R | I | L | K | E | E | S | D | E | A | L | K | M | T | A | S | S | P | A | S | R | Y | L | T | D | M | T | L | E | E | M | S | R |   |   |   |
| NY6750A | 1 | M  | D | S | N | T  | V | S | S  | F | V  | D  | C  | F | L | W   | H | R | K | R | F | A | D | Q | E | L | G | D | A | P | L | D | R | L | R | R | D | K | S | L | R | G | R | G | S | T | L | G | L | D | I | E | T | A | T | R | A | G | K | I | V | E | R | I | L | K | E | E | S | D | E | A | L | K | M | T | A | S | S | P | A | S | R | Y | L | T | D | M | T | L | E | E | M | S | R |   |   |   |
| Sw412A  | 1 | M  | D | S | N | T  | V | S | S  | F | V  | D  | C  | F | L | W   | H | R | K | R | F | A | D | Q | E | L | G | D | A | P | L | D | R | L | R | R | D | K | S | L | R | G | R | G | S | T | L | G | L | D | I | E | T | A | T | R | A | G | K | I | V | E | R | I | L | K | E | E | S | D | E | A | L | K | M | T | A | S | S | P | A | S | R | Y | L | T | D | M | T | L | E | E | M | S | R |   |   |   |
| O265B   | 1 | M  | D | S | N | T  | V | S | S  | F | V  | D  | C  | F | L | W   | H | R | K | L | S | M | R | D | M | C | D | A | P | F | D | D | R | L | R | R | D | K | A | L | K | R | G | R | G | S | T | L | G | L | D | L | R | V | A | T | M | E | G | K | K | I | V | E | D | I | L | K | S | E | T | D | E | N | L | K | I | A | I | A | S | S | P | A | P | R | Y | I | T | D | M | S | I | E | E | I | S | R |
| O430B   | 1 | M  | D | S | N | T  | V | S | S  | F | V  | D  | C  | F | L | W   | H | R | K | L | S | M | R | D | M | C | D | A | P | F | D | D | R | L | R | R | D | K | A | L | K | R | G | R | G | S | T | L | G | L | D | L | R | V | A | T | M | E | G | K | K | I | V | E | D | I | L | K | S | E | T | D | E | N | L | K | I | A | I | A | S | S | P | A | P | R | Y | I | T | D | M | S | I | E | E | I | S | R |
| O264B   | 1 | M  | D | S | N | T  | V | S | S  | F | V  | D  | C  | F | L | W   | H | R | K | L | S | M | R | D | M | C | D | A | P | F | D | D | R | L | R | R | D | K | A | L | K | R | G | R | G | S | T | L | G | L | D | L | R | V | A | T | M | E | G | K | K | I | V | E | D | I | L | K | S | E | T | D | E | N | L | K | I | A | I | A | S | S | P | A | P | R | Y | I | T | D | M | S | I | E | E | I | S | R |
| O339B   | 1 | M  | D | S | N | T  | V | S | S  | F | V  | D  | C  | F | L | W   | H | R | K | L | S | M | R | D | M | C | D | A | P | F | D | D | R | L | R | R | D | K | A | L | K | R | G | R | G | S | T | L | G | L | D | L | R | V | A | T | M | E | G | K | K | I | V | E | D | I | L | K | S | E | T | D | E | N | L | K | I | A | I | A | S | S | P | A | P | R | Y | I | T | D | M | S | I | E | E | I | S | R |
| O668B   | 1 | M  | D | S | N | T  | V | S | S  | F | V  | D  | C  | F | L | W   | H | R | K | L | S | M | R | D | M | C | D | A | P | F | D | D | R | L | R | R | D | K | A | L | K | R | G | R | G | S | T | L | G | L | D | L | R | V | A | T | M | E | G | K | K | I | V | E | D | I | L | K | S | E | T | D | E | N | L | K | I | A | I | A | S | S | P | A | P | R | Y | I | T | D | M | S | I | E | E | I | S | R |
| O671B   | 1 | M  | D | S | N | T  | V | S | S  | F | V  | D  | C  | F | L | W   | H | R | K | L | S | M | R | D | M | C | D | A | P | F | D | D | R | L | R | R | D | K | A | L | K | R | G | R | G | S | T | L | G | L | D | L | R | V | A | T | M | E | G | K | K | I | V | E | D | I | L | K | S | E | T | D | E | N | L | K | I | A | I | A | S | S | P | A | P | R | Y | I | T | D | M | S | I | E | E | I | S | R |
| O35B    | 1 | M  | D | S | N | T  | V | S | S  | F | V  | D  | C  | F | L | W   | H | R | K | L | S | M | R | D | M | C | D | A | P | F | D | D | R | L | R | R | D | K | A | L | K | R | G | R | G | S | T | L | G | L | D | L | R | V | A | T | M | E | G | K | K | I | V | E | D | I | L | K | S | E | T | D | E | N | L | K | I | A | I | A | S | S | P | A | P | R | Y | I | T | D | M | S | I | E | E | I | S | R |
| O246B   | 1 | M  | D | S | N | T  | V | S | S  | F | V  | D  | C  | F | L | W   | H | R | K | L | S | M | R | D | M | C | D | A | P | F | D | D | R | L | R | R | D | K | A | L | K | R | G | R | G | S | T | L | G | L | D | L | R | V | A | T | M | E | G | K | K | I | V | E | D | I | L | K | S | E | T | D | E | N | L | K | I | A | I | A | S | S | P | A | P | R | Y | I | T | D | M | S | I | E | E | I | S | R |
| Alb88B  | 1 | M  | D | S | N | T  | V | S | S  | F | V  | D  | C  | F | L | W   | H | R | K | L | S | M | R | D | M | C | D | A | P | F | D | D | R | L | R | R | D | K | A | L | K | R | G | R | G | S | T | L | G | L | D | L | R | V | A | T | M | E | G | K | K | I | V | E | D | I | L | K | S | E | T | D | E | N | L | K | I | A | I | A | S | S | P | A | P | R | Y | I | T | D | M | S | I | E | E | I | S | R |
| Sw418B  | 1 | M  | D | S | N | T  | V | S | S  | F | V  | D  | C  | F | L | W   | H | R | K | L | S | M | R | D | M | C | D | A | P | F | D | D | R | L | R | R | D | K | A | L | K | R | G | R | G | S | T | L | G | L | D | L | R | V | A | T | M | E | G | K | K | I | V | E | D | I | L | K | S | E | T | D | E | N | L | K | I | A | I | A | S | S | P | A | P | R | Y | I | T | D | M | S | I | E | E | I | S | R |
| NY107B  | 1 | M  | D | S | N | T  | V | S | S  | F | V  | D  | C  | F | L | W   | H | R | K | L | S | M | R | D | M | C | D | A | P | F | D | D | R | L | R | R | D | K | A | L | K | R | G | R | G | S | T | L | G | L | D | L | R | V | A | T | M | E | G | K | K | I | V | E | D | I | L | K | S | E | T | D | E | N | L | K | I | A | I | A | S | S | P | A | P | R | Y | I | T | D | M | S | I | E | E | I | S | R |
| J89B    | 1 | M  | D | S | N | T  | V | S | S  | F | V  | D  | C  | F | L | W   | H | R | K | L | S | M | R | D | M | C | D | A | P | F | D | D | R | L | R | R | D | K | A | L | K | R | G | R | G | S | T | L | G | L | D | L | R | V | A | T | M | E | G | K | K | I | V | E | D | I | L | K | S | E | T | D | E | N | L | K | I | A | I | A | S | S | P | A | P | R | Y | I | T | D | M | S | I | E | E | I | S | R |

Effector Domain (85 to 206)

|      |     | i | 120 | j | k | 140 | l | 160 | m | 180 | n | o | p | q | 200 |   |   |   |   |   |   |   |   |   |   |   |   |   |   |   |   |   |   |   |   |   |   |   |   |   |   |   |   |   |   |   |   |   |   |   |   |   |   |   |   |   |   |   |   |   |   |   |   |   |   |   |   |   |   |   |   |   |   |   |   |   |   |   |   |   |   |   |   |   |   |   |   |   |   |   |   |   |   |   |
|------|-----|---|-----|---|---|-----|---|-----|---|-----|---|---|---|---|-----|---|---|---|---|---|---|---|---|---|---|---|---|---|---|---|---|---|---|---|---|---|---|---|---|---|---|---|---|---|---|---|---|---|---|---|---|---|---|---|---|---|---|---|---|---|---|---|---|---|---|---|---|---|---|---|---|---|---|---|---|---|---|---|---|---|---|---|---|---|---|---|---|---|---|---|---|---|---|---|
| PR8  | 101 | D | W   | S | M | L   | P | K   | Q | K   | V | A | G | S | L   | C | I | R | M | D | A | I | M | D | K | N | I | L | K | A | N | F | S | V | L | F | D | Q | E | L | T | L | L | R | A | F | T | E | G | A | I | V | G | E | I | S | P | L | P | S | L | P | G | H | I | E | D | V | K | N | A | I | G | V | L | I | G | G | L | E | W | N | D | N | T | V | R | V | S | E | T | L | Q | R |
| Ca17 | 101 | D | W   | F | M | L   | M | P   | R | Q   | K | V | A | G | S   | L | C | I | R | M | D | A | I | M | D | K | N | I | L | K | A | N | F | S | V | L | F | D | Q | E | L | T | L | L | R | A | F | T |   |   |   |   |   |   |   |   |   |   |   |   |   |   |   |   |   |   |   |   |   |   |   |   |   |   |   |   |   |   |   |   |   |   |   |   |   |   |   |   |   |   |   |   |   |   |

default parameters. Alignments were processed using Boxshade Server ([http://www.ch.embnet.org/software/BOX\\_form.html](http://www.ch.embnet.org/software/BOX_form.html)).

a – <sup>21</sup>RFADQELG<sup>28</sup> and <sup>21</sup>LLSMRDMC<sup>28</sup> conserved within A- and B- alleles, respectively (1).

b – 35-41 nuclear localisation signal (2-4).

c – R38 essential for RNA binding. K41 plays important role. (5).

d – S42 is a phosphorylation site (6).

e – S48 and T49 are phosphorylation sites (7). T49 phosphorylation inhibits IFN-antagonism (8).

f – K70 SUMOylation site (9).

g – Y89 mediates PI3K binding (10, 11).

h – E96 and E97 mediate TRIM25 binding and inhibition (12).

i – F103 and M106 required for CPSF30 binding and inhibition (13, 14).

j – 123-127 involved in PKR binding and inhibition (15).

k – D125G mutation (GAT > GTT) forms splice acceptor site and NS3 expression (16).

l – 138-147 nuclear export signal (17).

m – P164 and P167 involved in PI3K binding (10, 18).

n – E186 involved in CPSF30 binding and inhibition (19-21).

o – W187 required for effector domain dimerisation (22).

p – E196K mutation fails to inhibit IRF3 activation (23).

q - T197 phosphorylation site (7).

r - <sup>211</sup>GPPLPPKQKRYMARRV<sup>226</sup> A2 rabbit polyclonal antiserum epitope.

s – <sup>212</sup>PPLPPK CRKL<sup>217</sup> motif binds CRKI/II and CRKL proteins to prevent strong activation of JNK-AFT2 pathway (24, 25).

t – T215 phosphorylation site (25).

u – 216-229 second nuclear localisation signal (2-4).

v – K219 and K221 are SUMOylation sites (9, 26).

w – 223-230 involved in PABPII binding and inhibition (20, 27).

x – <sup>227</sup>ESEV<sup>230</sup> motif for PDZ-domain binding and virulence factor (28, 29).

## References

1. **Munir M, Zohari S, Metreveli G, Baule C, Belak S, Berg M.** 2011. Alleles A and B of non-structural protein 1 of avian influenza A viruses differentially inhibit beta interferon production in human and mink lung cells. *The Journal of general virology* **92**:2111-2121.
2. **Greenspan D, Palese P, Krystal M.** 1988. Two nuclear location signals in the influenza virus NS1 nonstructural protein. *Journal of virology* **62**:3020-3026.
3. **Han H, Cui ZQ, Wang W, Zhang ZP, Wei HP, Zhou YF, Zhang XE.** 2010. New regulatory mechanisms for the intracellular localization and trafficking of influenza A virus NS1 protein revealed by comparative analysis of A/PR/8/34 and A/Sydney/5/97. *The Journal of general virology* **91**:2907-2917.
4. **Melen K, Kinnunen L, Fagerlund R, Ikonen N, Twu KY, Krug RM, Julkunen I.** 2007. Nuclear and nucleolar targeting of influenza A virus NS1 protein: striking differences between different virus subtypes. *Journal of virology* **81**:5995-6006.
5. **Wang W, Riedel K, Lynch P, Chien CY, Montelione GT, Krug RM.** 1999. RNA binding by the novel helical domain of the influenza virus NS1 protein requires its dimer structure and a small number of specific basic amino acids. *Rna* **5**:195-205.
6. **Hsiang TY, Zhou L, Krug RM.** 2012. Roles of the phosphorylation of specific serines and threonines in the NS1 protein of human influenza A viruses. *Journal of virology* **86**:10370-10376.
7. **Hutchinson EC, Denham EM, Thomas B, Trudgian DC, Hester SS, Ridlova G, York A, Turrell L, Fodor E.** 2012. Mapping the phosphoproteome of influenza A and B viruses by mass spectrometry. *PLoS pathogens* **8**:e1002993.
8. **Kathum OA, Schrader T, Anhlan D, Nordhoff C, Liedmann S, Pande A, Mellmann A, Ehrhardt C, Wixler V, Ludwig S.** 2016. Phosphorylation of influenza A virus NS1 protein at threonine 49 suppresses its interferon antagonistic activity. *Cellular microbiology* **18**:784-791.
9. **Santos A, Pal S, Chacon J, Meraz K, Gonzalez J, Prieto K, Rosas-Acosta G.** 2013. SUMOylation Affects the Interferon Blocking Activity of the Influenza A Nonstructural Protein NS1 without Affecting Its Stability or Cellular Localization. *Journal of virology* **87**:5602-5620.
10. **Hale BG, Kerry PS, Jackson D, Precious BL, Gray A, Killip MJ, Randall RE, Russell RJ.** 2010. Structural insights into phosphoinositide 3-kinase activation by the influenza A virus NS1 protein. *Proceedings of the National Academy of Sciences of the United States of America* **107**:1954-1959.
11. **Hale BG, Jackson D, Chen YH, Lamb RA, Randall RE.** 2006. Influenza A virus NS1 protein binds p85beta and activates phosphatidylinositol-3-kinase signaling.



- Proceedings of the National Academy of Sciences of the United States of America **103**:14194-14199.
12. **Gack MU, Albrecht RA, Urano T, Inn KS, Huang IC, Carnero E, Farzan M, Inoue S, Jung JU, Garcia-Sastre A.** 2009. Influenza A virus NS1 targets the ubiquitin ligase TRIM25 to evade recognition by the host viral RNA sensor RIG-I. *Cell host & microbe* **5**:439-449.
  13. **Kochs G, Garcia-Sastre A, Martinez-Sobrido L.** 2007. Multiple anti-interferon actions of the influenza A virus NS1 protein. *Journal of virology* **81**:7011-7021.
  14. **Das K, Ma LC, Xiao R, Radvansky B, Aramini J, Zhao L, Marklund J, Kuo RL, Twu KY, Arnold E, Krug RM, Montelione GT.** 2008. Structural basis for suppression of a host antiviral response by influenza A virus. *Proceedings of the National Academy of Sciences of the United States of America* **105**:13093-13098.
  15. **Min JY, Li S, Sen GC, Krug RM.** 2007. A site on the influenza A virus NS1 protein mediates both inhibition of PKR activation and temporal regulation of viral RNA synthesis. *Virology* **363**:236-243.
  16. **Selman M, Dankar SK, Forbes NE, Jia J-J, Brown EG.** 2012. Adaptive mutation in influenza A virus non-structural gene is linked to host switching and induces a novel protein by alternative splicing. *Emerging Microbes & Infections* **1**:e42.
  17. **Li Y, Yamakita Y, Krug RM.** 1998. Regulation of a nuclear export signal by an adjacent inhibitory sequence: the effector domain of the influenza virus NS1 protein. *Proceedings of the National Academy of Sciences of the United States of America* **95**:4864-4869.
  18. **Shin YK, Li Y, Liu Q, Anderson DH, Babiuk LA, Zhou Y.** 2007. SH3 binding motif 1 in influenza A virus NS1 protein is essential for PI3K/Akt signaling pathway activation. *Journal of virology* **81**:12730-12739.
  19. **Nemeroff ME, Barabino SML, Li Y, Keller W, Krug RM.** 1998. Influenza Virus NS1 Protein Interacts with the Cellular 30kDa Subunit of CPSF and Inhibits 3' End Formation of Cellular Pre-mRNAs. *Molecular Cell* **1**:991-1000.
  20. **Li Y, Chen ZY, Wang W, Baker CC, Krug RM.** 2001. The 3'-end-processing factor CPSF is required for the splicing of single-intron pre-mRNAs in vivo. *Rna* **7**:920-931.
  21. **Noah DL, Twu KY, Krug RM.** 2003. Cellular antiviral responses against influenza A virus are countered at the posttranscriptional level by the viral NS1A protein via its binding to a cellular protein required for the 3' end processing of cellular pre-mRNAs. *Virology* **307**:386-395.
  22. **Kerry PS, Long E, Taylor MA, Russell RJ.** 2011. Conservation of a crystallographic interface suggests a role for beta-sheet augmentation in influenza virus NS1 multifunctionality. *Acta crystallographica. Section F, Structural biology and crystallization communications* **67**:858-861.
  23. **Kuo RL, Zhao C, Malur M, Krug RM.** 2010. Influenza A virus strains that circulate in humans differ in the ability of their NS1 proteins to block the activation of IRF3 and interferon-beta transcription. *Virology* **408**:146-158.
  24. **Heikkinen LS, Kazlauskas A, Melen K, Wagner R, Ziegler T, Julkunen I, Saksela K.** 2008. Avian and 1918 Spanish influenza a virus NS1 proteins bind to Crk/CrkL Src homology 3 domains to activate host cell signaling. *The Journal of biological chemistry* **283**:5719-5727.
  25. **Hale BG, Knebel A, Botting CH, Galloway CS, Precious BL, Jackson D, Elliott RM, Randall RE.** 2009. CDK/ERK-mediated phosphorylation of the human influenza A virus NS1 protein at threonine-215. *Virology* **383**:6-11.

26. **Xu K, Klenk C, Liu B, Keiner B, Cheng J, Zheng BJ, Li L, Han Q, Wang C, Li T, Chen Z, Shu Y, Liu J, Klenk HD, Sun B.** 2011. Modification of nonstructural protein 1 of influenza A virus by SUMO1. *Journal of virology* **85**:1086-1098.
27. **Chen Z, Li Y, Krug RM.** 1999. Influenza A virus NS1 protein targets poly(A)-binding protein II of the cellular 3'-end processing machinery. *The EMBO Journal* **18**:2273-2283.
28. **Obenauer JC, Denson J, Mehta PK, Su X, Mukatira S, Finkelstein DB, Xu X, Wang J, Ma J, Fan Y, Rakestraw KM, Webster RG, Hoffmann E, Krauss S, Zheng J, Zhang Z, Naeve CW.** 2006. Large-scale sequence analysis of avian influenza isolates. *Science* **311**:1576-1580.
29. **Jackson D, Hossain MJ, Hickman D, Perez DR, Lamb RA.** 2008. A new influenza virus virulence determinant: the NS1 protein four C-terminal residues modulate pathogenicity. *Proceedings of the National Academy of Sciences of the United States of America* **105**:4381-4386.
